# Supplementary material for: Optimization of Mature Embryo-Based Tissue Culture and Agrobacterium-Mediated Transformation in Model Grass Brachypodium distachyon
Source: PubMed Central journal article supplement (PMC6862288; doi:10.3390/ijms20215448), 2019-10-31
Supplement: ijms-20-05448-s001.pdf [file ijms-20-05448-s001.pdf]

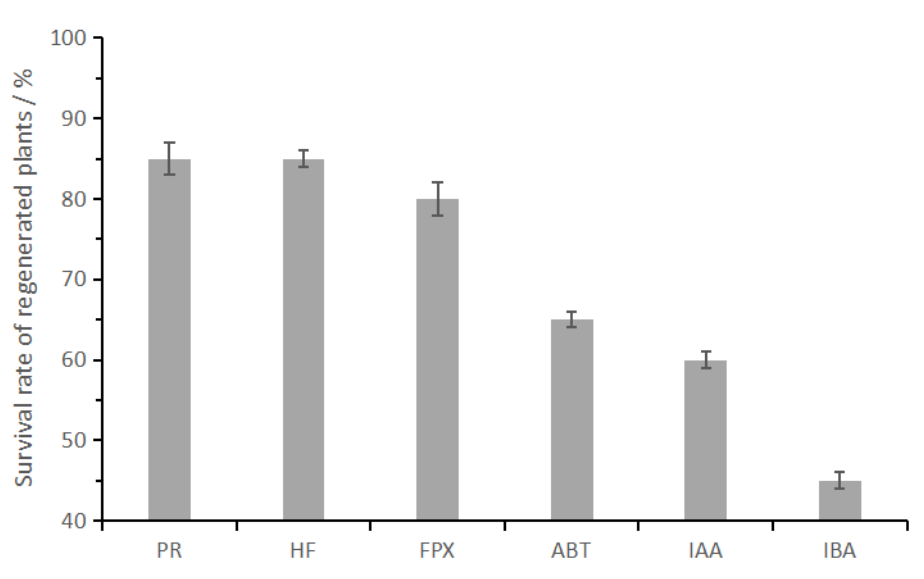

**Supplementary Figure 1.** Survival rate of regenerated plants between PR and RIM-based methods. For each treatment, three replicates were conducted. Error bars represent  $\pm$  SE,  $n=3$ . HF, hormone-free RIM. ABT, ABT-2 rooting powder. IAA, 3-Indole acetic acid. IBA, Indole-4-butyric acid.
